# Supplementary material for: Membranes of Polymers of Intrinsic Microporosity (PIM-1) Modified by Poly(ethylene glycol)
Source: MDPI journal article supplement (doi:10.3390/membranes7020028), 2017-06-05
Supplement: s1 [file s1]

# Supplementary Materials: Membranes of Polymers of Intrinsic Microporosity (PIM-1) Modified by Poly(ethylene glycol)

Gisela Bengtson, Silvio Neumann, Volkan Filiz

## S1. Synthesis of Monomers and Polymers

*Materials:* Most chemicals and solvents were delivered by Sigma Aldrich (Germany) and used as received. 5,5',6,6'-Tetrahydroxy-3,3,3',3'-tetramethyl-1,1'-spirobisindane (**1**) was purchased from ABCR (Germany), Maleimide-PEG-2000 (**7a**) from Specific Polymers (France) and Jeffamine®-600 from Huntsman (Germany), all used as received. 2,3,5,6-tetrafluoro-1,4-dicyanobenzene (**2**) was donated from Lanxess (Germany) and sublimed twice at 80 °C and reduced pressure. K<sub>2</sub>CO<sub>3</sub> was dried at 120 °C and milled.

### Synthesis within Paths 1, 2, 3, 4:

- Preparation of PIM-1 by polycondensation reaction (upper part of Scheme 1) was performed either by low temperature method following Budd and McKeown [2] and applying 1:2:K<sub>2</sub>CO<sub>3</sub> in molecular equivalents 1:1:2.04 (in paths 2, 3) or by high temperature method following [18, 21], applying identical amounts of the components at 150 °C and adding appropriate amounts of diethyl benzene to prevent a fast precipitation of the polymer. Reaction time is 0.5 h (PIM-1 in path 1).
- Preparation of 2,4,5-trihydroxybenzoic acid (THBA)-PEG-mono-esters (**3a-c**) and 3,4-dihydroxybenzoic acid (DHBA)-PEG-di-esters (**5a-c**) was performed by water extracting distillation of THBA resp. DHBA and PEG in boiling toluene in presence of catalytic amounts of p-toluene sulfonic acid. Reaction time 2 to 10 days, progress of reaction was followed by sampling, work up either by filtration/drying or by extraction, followed by evaporation of solvent under reduced pressure.

*Monomer synthesis example 1.* Preparation of **3b**: 2.000g (11.76 mmol) 2,4,5-trihydroxybenzoic acid (THBA) and 11.463 g (15.28 mmol) methoxy-PEG-750 were dissolved in toluene, 0.200 g (1.06 mmol) p-toluene sulfonic acid was added and the solution was refluxed in a Dean-Stark trap for 4 days. Progress of reaction was followed by sampling. After cooling the dark solution was poured in H<sub>2</sub>O, organic phase separated, dried and toluene was evaporated at reduced pressure. Yield 8.62 g brown oil **3b** (80%). <sup>1</sup>H (DMSO-d<sub>6</sub>) δ = 3.24 (s, 3H), 3.51 (s, ca. 70H), 3.70 (m, 2H), 6.96 (s, 2H), 9.8 (br, 3H) ppm. <sup>13</sup>C (DMSO-d<sub>6</sub>) δ = 60.7 (OCH<sub>3</sub>), 63.9, 70.3 (OCH<sub>2</sub>), 109.1 (arCH), 119.7 (arC-COO), 138.9/146.0 (arC-OH), 166.2 (C=O) ppm. FT-IR: 3294, 2867, 1709, 1609, 1452, 1347, 1304, 1217, 1088, 1034, 947, 846 cm<sup>-1</sup>.

*Monomer synthesis example 2.* Preparation of **5b**: 1.618 g (10.5 mmol) 3,4-dihydroxybenzoic acid (DHBA) and 4.990g (4.99 mmol) PEG-1000 were dissolved in toluene, 0.17g (0.99 mmol) p-toluene sulfonic acid was added and the solution was refluxed in a Dean-Stark trap for 4 days. Progress of reaction was followed by sampling. After cooling precipitated **5b** was filtered off, washed with toluene and dried at 50 °C/0.05 mbar. 2.5 g waxy brownish solid **5b** (yield 40%). <sup>1</sup>H (DMSO-d<sub>6</sub>) δ = 3.49 (s, ca. 90H), 3.72(m, 4H), 4.30 (m, 4H), 6.82 (d, 2H), 7.33 (2d, 2H), 7.39 (d, 2H), 9.5 (br, 4H) ppm. FT-IR: 3289, 2868, 1708, 1602, 1521, 1442, 1349, 1218, 1085, 946, 889, 839, 766 cm<sup>-1</sup>.

- Polymers **4a-c** and PIM(X)-b-PEO(Y) multiblock copolymers were prepared by low temperature method [2].

*Polymerization example 3.* Preparation of **4b**: 1st step (polycondensation to PIM-1): 1.021 g (3 mmol) **1**, 0.600 g (3.0 mmol) **2** and 0.846 g (6.12 mmol) K<sub>2</sub>CO<sub>3</sub> were dissolved in DMF, heated to 55 °C for 3 h. 2nd step (quenching polycondensation of PIM-1 with **3b**): 0.012 (0.086 mmol) K<sub>2</sub>CO<sub>3</sub> was added to the warm suspension of 1st step and stirred for 5 min, 0.0055 g (0.03 mmol) **2** was added and stirred for another 15 min, 0.059 g (0.064 mmol) **3b**, dissolved in 1 mL DMF, was added and stirred for additional 30 min.

Final suspension was poured in H<sub>2</sub>O, filtered and dried; re-precipitation from CHCl<sub>3</sub> solution in MeOH, drying in vacuo. 1.377 g yellow powder **4b** (95% yield). SEC (MALS): M<sub>w</sub> 52000 g/mol, M<sub>n</sub> 40500 g/mol. <sup>1</sup>H (CDCl<sub>3</sub>) δ = 1.31/1.37 (PIM-1), 2.17/2.33 (PIM-1), 3.65 (PEO), 6.42/6.81 (PIM-1). FT-IR: 2956, 2864, 2240, 1445, 1310, 1288, 1262, 1211, 1108, 1009, 874, 735 cm<sup>-1</sup>.

*Polymerization example 4.* Preparation of **PIM(10)-b-PEO(1)**: 1st step (polycondensation to PIM-1): 1.02 g (3 mmol) **1**, 0.66 g (3.3 mmol) **2** and 0.846 g (6.12 mmol) K<sub>2</sub>CO<sub>3</sub> were dissolved in DMF, heated to 55 °C for 3 h, yellow suspension was poured in H<sub>2</sub>O, filtered and dried; re-precipitation from CHCl<sub>3</sub> solution in MeOH, drying in vacuo, 1.34 g bright yellow powder (97%). M<sub>w</sub> (RI) 9400 g/mol, M<sub>n</sub> 5000 g/mol. 2nd step (polycondensation of PIM-1 with **5b**): 0.501 g (0.05 mmol) PIM-1 (from 1st step) and 0.0667 g (0.0503 mmol) **5b** were suspended resp. dissolved in DMF, 0.161 g (1.171 mmol) K<sub>2</sub>CO<sub>3</sub> was added, suspension was heated to 55 °C for 7 days; progress of reaction was followed by sampling. The final suspension was poured in H<sub>2</sub>O, filtered off and the precipitate was dried; re-precipitation from CHCl<sub>3</sub> solution in MeOH, drying in vacuo. 0.374 g greenish yellow solid **PIM(10)-b-PEO(1)** (40%). SEC (MALS): M<sub>w</sub> 99000 g/mol, M<sub>n</sub> 70000 g/mol. <sup>1</sup>H (CDCl<sub>3</sub>) δ = 1.31/1.37 (PIM-1), 2.16/2.33 (PIM-1), 3.63 (PEO), 3.8/4.4 (PEG-ester), 6.42/6.81 (PIM-1), 7.04/7.66/7.78 (DHBA) ppm. <sup>13</sup>C (DMSO-d<sub>6</sub>) δ = 21.4(PIM-1), 63.9, 68.9, 70.3 (PEO), 115.7/116.8 (PIM-1), 121.0, 122.3, 125.7, 128.6/129.3 (DHBA), 145.5, 150.9, 166.1 (DHBA) ppm. FT-IR: 2954, 2865, 2241, 1722, 1445, 1309, 1287, 1262, 1211, 1108, 1008, 874, 753 cm<sup>-1</sup>.

#### -Synthesis within Path 4

Preparation of 9,10-dibutylanthracene-2,3,6,7-tetrol (**6**) see [14,22]. After hydrolysis of methoxy to hydroxy groups by BBr<sub>3</sub>, **6** was obtained as an off-white powder of mp. 218–220 °C.

*Preparation of monomer 8a:* Diels-Alder reaction of **6** and maleimide-PEG-2000 (**7a**) was accomplished in p-xylene, 24 h reflux, evaporation of xylene under reduced pressure. Light brown solid **8a** (95%), mp. 46 °C. <sup>1</sup>H (DMSO-d<sub>6</sub>) δ = 1.09 (t, 6H), 1.66 (m, 4H), 1.91 (m, 2H), 2.08 (m, 2H), 2.64 (m, 2H), 2.73 (m, 2H), 3.14 (s, 2H), 3.24 (s, 3H), 3.51 (br, 176H (PEG-OCH<sub>2</sub>)), 6.56 (s, 2H), 6.67 (s, 2H), 8.50 (s, 2H), 8.68 (s, 2H) ppm.

<sup>13</sup>C (DMSO-d<sub>6</sub>) δ = 15.5 (butyl-CH<sub>3</sub>), 23.5(3-butyl-CH<sub>2</sub>), 27.0(2-butyl-CH<sub>2</sub>), 36.9(4-butyl-CH<sub>2</sub>), 45.3(C-bicyclo), 58.4(Imido-CH), 66.3(N-CH<sub>2</sub>), 70.1(CH<sub>2</sub>-O), 71.6(QCH<sub>3</sub>), 110.3/111.3(arC-H), 134.4/136.2(arC-bicyclo), 142.4/142.8(arC-OH), 176.1(C=O).

FT-IR: 2880, 1766, 1466, 1359, 1280, 1239, 1101(s), 1059, 595, 841 cm<sup>-1</sup>. Elemental analysis: Calculated: C 57.3, H 8.59, N 0.59 Found: C 56.99, H 8.70, N 0.67 (%).

*Preparation of monomer 8b:* Maleimide-methoxy(polypropylene glycol) (**7b**) with PPO chain of ca. 600 g/mol, a viscous oil, was synthesized after [21] in 2 steps from Jeffamine®-M600 polyetheramine and maleic anhydride in 84% yield. <sup>1</sup>H (DMSO-d<sub>6</sub>) δ = 1.03 (d, 27H), 3.25 (s, 3H), 3.29-3.51 (m, 31H), 6.97 (2s, 2H). FT-IR: 2974, 2871, 1710, 1455, 1375, 1094, 1014, 926, 832 cm<sup>-1</sup>.

Diels-Alder reaction of **6** and maleimide-PPO-600 (**7b**) conducted in p-xylene; 4 d reflux, evaporation of xylene under reduced pressure. **8b**, dark brown oil (70%). <sup>1</sup>H (DMSO-d<sub>6</sub>) δ = 1.04 (d, 33H), 1.65 (m, 6H), 1.91 (m, 2H), 2.08 (m, 2H), 2.65 (m, 2H), 3.25 (s, 3H), 3.37 (s, 31H), 6.58 (s, 1H), 6.68 (s, 1H), 7.06 (s, 2H), 8.58 (br, 2H), 8.69 (br, 2H) ppm. <sup>13</sup>C (DMSO-d<sub>6</sub>) δ = 14.6 (butyl-CH<sub>3</sub>), 17.8(PPO-CH<sub>3</sub>), 23.7(3-butyl-CH<sub>2</sub>), 27.1/28.3 (2-butyl-CH<sub>2</sub>), 45.5(C-bicyclo), 49.1(CH-N), 58.8(imido-CH), 68.3/72.8/75.1 (PPO-OCH<sub>2</sub>), 76.3(PPO-OCH<sub>3</sub>), 110.4/111.4 (arCH), 134.3, 136.5, 142.4/143.0(arC-OH), 176.7(C=O). FT-IR: 3350, 2966, 2930, 2870, 1694, 1451, 1375, 1297, 1212, 1089, 1025 cm<sup>-1</sup>.

*Polymerization example 5.* Preparation of **PIM1-co-8a-1**: 0.917 g (0.375 mmol) **8a**, 4.978 g (14.625 mmol) **1**, 3.001 g (15 mmol) **2** were dissolved in DMF, 4.229 g (30.6 mmol) K<sub>2</sub>CO<sub>3</sub> was added at room temperature. The suspension was heated to 55 °C for 3 days and worked up as in examples 3 and 4. Re-precipitation from CHCl<sub>3</sub> solution in MeOH, yield 7.644 g of yellow powder (99% based on **8a**). SEC (MALS): M<sub>w</sub> 43000 g/mol, M<sub>n</sub> 33800 g/mol. <sup>1</sup>H (CDCl<sub>3</sub>) δ = 1.31/1.37 (PIM-1), 2.16/2.33 (PIM-1), 3.42 (PEO), 6.42/6.81 (PIM-1) ppm. FT-IR: 3054, 2865, 2240, 1445, 1310, 1288, 1263, 1211, 1108, 1009, 874, 753 cm<sup>-1</sup>.

## S2 Gas Separation

Gas permeation measurements were carried out in a fixed-volume pressure-increase apparatus in the time lag mode (descriptions of the method in [5,16,17] and literature cited therein), applying the solution-diffusion model [15]. Permeate volume is 224 cm<sup>3</sup>, membrane area 13.8 cm<sup>2</sup>, feed pressure 200–300 torr (26.6–40 × 10<sup>4</sup> Pa).

Measurements in the time lag apparatus primarily give the permeability for result, calculated by the increase of pressure on the permeate side per time after reaching a “quasi” steady state. Permeability coefficients  $P$  are calculated by eq. 1 ( $V_p$  is the permeate volume,  $l$  the actual membrane thickness,  $A$  the membrane area,  $p_f$  the feed pressure (constant) and  $p_{p1}$  resp.  $p_{p2}$  permeate pressures at different times). Permeability is expressed in Barrer [ $1 \times 10^{-10}$  (cm<sup>3</sup>(STP) cm cm<sup>-2</sup>s<sup>-1</sup>cmHg<sup>-1</sup>)].

$$P = \frac{V_p \times l}{A \times RT \times \Delta t} \ln\left(\frac{p_f - p_{p1}}{p_f - p_{p2}}\right) \quad (1)$$

Diffusivity coefficients  $D$  are calculated by Equation (2) using the so called time lag  $\theta$ , the delay of pressure increase at start of every experiment, and the square of the membrane thickness  $l$ . Diffusivity is expressed in cm<sup>2</sup>/s.

$$D = \frac{l^2}{6 \times \theta} \quad (2)$$

The measured time lag  $\theta$  of a PIM-1 membrane (thickness 80 μm, 30 °C) varies from ca. 0.1 (He and H<sub>2</sub>), ca. 2 (O<sub>2</sub>), ca. 6 (CO<sub>2</sub> and N<sub>2</sub>) to about 16 s for CH<sub>4</sub>. Although the time lag and permeability measurements are repeated several times, the experimental error for small gases like H<sub>2</sub> and He within the highly permeable PIM-1 membrane is considerable high and the results are not really reliable.. Consequently, we concentrated on the results for the larger gas molecules under consideration being more reliable on account of their slower diffusion.

Following the solution-diffusion-model [15] permeability  $P$  is the product of diffusivity  $D$  and solubility  $S$ . Accordingly, the solubility coefficient  $S$  is calculated by eq. (3), dividing  $P$  by  $D$ .

Solubility unit is cm<sup>3</sup>/cm<sup>3</sup>·cmHg.

$$S = \frac{P}{D} \quad (3)$$
